# Supplementary material for: Bisphenol a Exposure and Kidney Diseases: Systematic Review, Meta-Analysis, and NHANES 03–16 Study
Source: MDPI journal article supplement (doi:10.3390/biom11071046), 2021-07-16
Supplement: s1 [file s1]

**Table S1.** Summary of the main characteristics of the papers included in the systematic review. Abbreviations: CKD, Chronic Kidney Disease; GM, Geometric Mean; CI, Confidence Interval; GSD, Geometric Standard Deviation); SD, Standard Deviation; IR, Interquartile Range; ITR, Intertertile Range; BPA e, BPA exposed; BPA non-e, BPA non-exposed; SRI, Severe Renal Injury; MRI, Moderate Renal Injury.

| Study         | Year | Country           | Study design                       | Sample size                      | Sex                          | Age, Median (Range), years<br>/ Mean±SD          | Exposure (ng/ml)                                               | Exposure assessment               | Study period<br>(years) | Biologic<br>fluid |
|---------------|------|-------------------|------------------------------------|----------------------------------|------------------------------|--------------------------------------------------|----------------------------------------------------------------|-----------------------------------|-------------------------|-------------------|
| You [1]       | 2011 | USA               | Cross-sectional                    | 2573                             | Males and females            | 47.12 (>20 years)                                | 2.04 (1.76, 2.36) – 2.46 (2.41, 2.50)<br>GM (95%CI)            | HPLC-MS after<br>deconjugation    | 2003-2006               | Urine             |
| Li [2]        | 2012 | China             | Cross-sectional                    | 3455                             | Males and females            | 60.8 ± 9.9                                       | 0.81 (0.48 - 1.44) Median (IR)                                 | HPLC-MS after<br>deconjugation    | 2008-2009               | Urine             |
| Trasande [3]  | 2013 | USA               | Cross sectional                    | 710                              | Males and females            | (6-11)<br>(12-19)                                | 2.25 Mean<br>1.76 Mean                                         | HPLC-MS after<br>deconjugation    | 2009-2010               | Urine             |
| Krieter [4]   | 2013 | Germany           | Cross-sectional (Case-<br>control) | 152 CKD patients + 24<br>healthy | Males and females            | 69.7 ± 12.6                                      | CKD stage 5 with dialysis 10 ± 6.6<br>Mean (SD)                | ELISA                             | -----                   | Plasma            |
| Hu [5]        | 2015 | China             | Longitudinal study                 | 121 type 2 diabetes<br>patients  | Males and females            | 65.13 ± 10.57                                    | 0.40 (0.174, 1.40) Median (ITR)                                | ELISA                             | 2008-2014               | Serum             |
| Hu [6]        | 2016 | China             | Longitudinal study                 | 302 hypertensive<br>patients     | Males and females            | 65.29 ± 9.78                                     | 0.61 (0.26, 2.44) Median (ITR)                                 | ELISA                             | 2008-2014               | Serum             |
| Malits [7]    | 2018 | USA               | Cross sectional (case-<br>control) | 538 CKD patients                 | Males and females            | 10.77 ± 0.18 (1-17)                              | 0.69 (0.61, 0.78) GM (95% CI)                                  | HPLC-MS after<br>deconjugation    | 2005-2008;<br>2009-2014 | Urine             |
| Kang [8]      | 2019 | Korea             | Cross-sectional                    | 441                              | Female (before<br>menopause) | 34.77 (20-48)                                    | 0,5 median                                                     | HPLC-MS after<br>deconjugation    | 2015-2016               | Urine             |
| Shen [9]      | 2019 | China             | Cross sectional                    | 58 CKD,30 healthy                | Males and females            | 63.12 ± 6.31 (BPA e)<br>60.45 ± 6.95 (BPA non-e) | SRI: 14.30 (8.93, 16.32)<br>MRI: 2.79 (1.01, 4.08) GM (95% CI) | HPLC-MS after<br>deconjugation    | -----                   | Serum             |
| Lee [10]      | 2020 | Korea             | Cross sectional                    | 1292                             | Males and females            | (19 - >70)                                       | 1.31 (0.51, 2.72) Median (IR)                                  | UPLC-MS/MS after<br>deconjugation | 2015-2017               | Urine             |
| Jacobson [11] | 2020 | USA and<br>Canada | Cross sectional                    | 618                              | Males and females            | 11 (7.6, 14.6) Median (IR)                       | 0.59 (3.49) GM (GSD)                                           | HPLC-MS after<br>deconjugation    | 2005-2015               | Urine             |
| Kang [12]     | 2021 | USA               | Cross sectional                    | 9008                             | Males and females            | (20 – 79)                                        | 1.5 (0.7, 3) GM (IR)                                           | HPLC-MS after<br>deconjugation    | 2005 - 2016             | Urine             |

## References

1. You, L.; Zhu, X.; Shrubsole, M.J.; Fan, H.; Chen, J.; Dong, J.; Hao, C.-M.M.; Dai, Q. Renal function, bisphenol A, and alkylphenols: Results from the National Health and Nutrition Examination Survey (NHANES 2003-2006). *Environ. Health Perspect.* **2011**, *119*, 527–533, doi:10.1289/ehp.1002572.
2. Li, M.; Bi, Y.; Qi, L.; Wang, T.; Xu, M.; Huang, Y.; Xu, Y.; Chen, Y.; Lu, J.; Wang, W.; et al. Exposure to bisphenol A is associated with low-grade albuminuria in Chinese adults. *Kidney Int.* **2012**, *81*, 1131–1139, doi:10.1038/ki.2012.6.
3. Trasande, L.; Attina, T.M.; Trachtman, H. Bisphenol A exposure is associated with low-grade urinary albumin excretion in children of the United States. *Kidney Int.* **2013**, *83*, 741–748, doi:10.1038/ki.2012.422.
4. Krieter, D.H.; Canaud, B.; Lemke, H.-D.D.; Rodriguez, A.; Morgenroth, A.; von Appen, K.; Dragoun, G.-P.P.; Wanner, C. Bisphenol A in Chronic Kidney Disease. *Artif. Organs* **2013**, *37*, 283–290, doi:10.1111/j.1525-1594.2012.01556.x.
5. Hu, J.; Yang, S.; Wang, Y.; Goswami, R.; Peng, C.; Gao, R.; Zhou, H.; Zhang, Y.; Cheng, Q.; Zhen, Q.; et al. Serum bisphenol A and progression of type 2 diabetic nephropathy: a 6-year prospective study. *ACTA Diabetol.* **2015**, *52*, 1135–1141, doi:10.1007/s00592-015-0801-5.
6. Hu, J.; Wang, Y.; Xiang, X.; Peng, C.; Gao, R.; Goswami, R.; Zhou, H.; Zhang, Y.; Zhen, Q.; Cheng, Q.; et al. Serum bisphenol A as a predictor of chronic kidney disease progression in primary hypertension: A 6-year prospective study. *J. Hypertens.* **2016**, *34*, 332–337, doi:10.1097/HJH.0000000000000780.
7. Malits, J.; Attina, T.M.; Karthikraj, R.; Kannan, K.; Naidu, M.; Furth, S.; Warady, B.A.; Vento, S.; Trachtman, H.; Trasande, L. Renal Function and exposure to Bisphenol A and phthalates in children with Chronic Kidney Disease. *Environ. Res.* **2018**, *167*, 575–582, doi:10.1016/j.envres.2018.08.006.
8. Kang, H.; Kim, S.; Lee, G.; Lee, I.; Lee, J.P.; Lee, J.; Park, H.; Moon, H.-B.; Park, J.; Kim, S.; et al. Urinary metabolites of dibutyl phthalate and benzophenone-3 are potential chemical risk factors of chronic kidney function markers among healthy women. *Environ. Int.* **2019**, *124*, 354–360, doi:10.1016/j.envint.2019.01.028.
9. Shen, Y.; Liu, T.; Shi, Y.; Zhuang, F.; Lu, J.; Zhu, Q.; Ding, F. Bisphenol A analogs in patients with chronic kidney disease and dialysis therapy. *Ecotoxicol. Environ. Saf.* **2019**, *185*, doi:10.1016/j.ecoenv.2019.109684.
10. Lee, I.; Park, J.Y.; Kim, S.; An, J.N.; Lee, J.; Park, H.; Jung, S.K.; Kim, S.Y.; Lee, J.P.; Choi, K. Association of exposure to phthalates and environmental phenolics with markers of kidney function: Korean National Environmental Health Survey (KoNEHS) 2015-2017. *Environ. Int.* **2020**, *143*, doi:10.1016/j.envint.2020.105877.
11. Jacobson, M.H.; Wu, Y.; Liu, M.; Attina, T.M.; Naidu, M.; Karthikraj, R.; Kannan, K.; Warady, B.A.; Furth, S.; Vento, S.; et al. Serially assessed bisphenol A and phthalate exposure and association with kidney function in children with chronic kidney disease in the US and Canada: A longitudinal cohort study. *PLOS Med.* **2020**, *17*, doi:10.1371/journal.pmed.1003384.
12. Kang, H.; Lee, J.P.; Choi, K. Exposure to phthalates and environmental phenols in association with chronic kidney disease (CKD) among the general US population participating in multi-cycle NHANES (2005-2016). *Sci. Total Environ.* **2021**, *791*, 148343, doi:10.1016/j.scitotenv.2021.148343.
